# Supplementary material
Source: PubMed Central journal article supplement (PMC3799919)
Supplement: NIHMS495224-supplement-1_si_001.pdf [file NIHMS495224-supplement-1_si_001.pdf]

# Self-Assembled Tat Nanofibers as Effective Drug Carrier and Transporter

*Pengcheng Zhang, Andrew G. Cheetham, Yi-An Lin, Honggang Cui\**

Department of Chemical and Biomolecular Engineering, and Institute for NanoBioTechnology, The Johns Hopkins University, Baltimore, MD 21218, United States

\*Email: [hcui6@jhu.edu](mailto:hcui6@jhu.edu)

## CONTENTS

|                                                                                          |     |
|------------------------------------------------------------------------------------------|-----|
| <b>Figure S1.</b> Characterization of mC <sub>8</sub> -Tat                               | S2  |
| <b>Figure S2.</b> Characterization of dC <sub>8</sub> -Tat                               | S3  |
| <b>Figure S3.</b> Characterization of qC <sub>8</sub> -Tat                               | S4  |
| <b>Figure S4.</b> Wide angle X-ray scattering of Tat nanofibers                          | S5  |
| <b>Figure S5.</b> TEM of qC <sub>8</sub> -Tat nanofiber in DPBS                          | S6  |
| <b>Figure S6.</b> TEM of qC <sub>8</sub> -Tat nanofiber loaded with PTX (100:1, mol/mol) | S7  |
| <b>Figure S7.</b> TEM of qC <sub>8</sub> -Tat nanofiber loaded with PTX (20:1, mol/mol)  | S8  |
| <b>Figure S8.</b> TEM of qC <sub>8</sub> -Tat nanofiber loaded with PTX (10:1, mol/mol)  | S9  |
| <b>Figure S9.</b> TEM of qC <sub>8</sub> -Tat nanofiber loaded with PTX (20:3, mol/mol)  | S10 |
| <b>Figure S10.</b> TEM of qC <sub>8</sub> -Tat nanofiber loaded with PTX (5:1, mol/mol)  | S11 |
| <b>Table S1.</b> The measured diameters of PTX-N with different drug loading             | S12 |
| <b>Figure S11.</b> CD spectra of Tat nanofibers and PTX-N                                | S13 |
| <b>Figure S12.</b> The cellular uptake of coumarin-6 or C6-N by KB-3-1                   | S14 |
| <b>Figure S13.</b> The cellular uptake of Flutax-2 or Flutax-2-N by KB-3-1               | S15 |
| <b>Figure S14.</b> Cytotoxicity of PTX-N to A549                                         | S16 |
| <b>Figure S15.</b> Cytotoxicity of PTX-N to MDA-MB-231                                   | S17 |
| <b>Figure S16.</b> Cytotoxicity of PTX-N to OVCAR-8                                      | S18 |
| <b>Figure S17.</b> Subcellular localization of free coumarin-6 in KB-3-1 cells           | S19 |
| <b>Figure S18.</b> Subcellular localization of free Flutax-2 in KB-3-1 cells             | S20 |

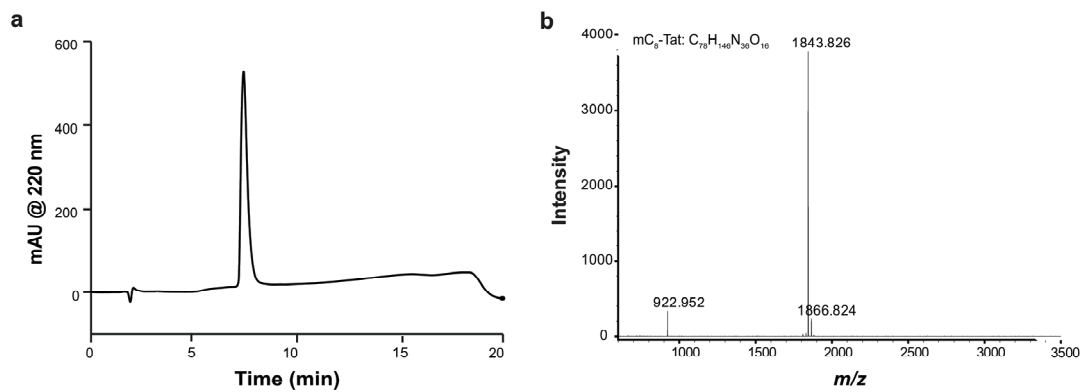

**Figure S1.** RP-HPLC (a) and MALDI-TOF MS (b) characterization of mC<sub>8</sub>-Tat. The RP-HPLC spectrum confirms the purity of the product (>99%). The peaks at 922.952, 1843.826, and 1866.824 correspond to  $[M+2H]^{2+}$ ,  $[M+H]^+$  and  $[M+Na]^+$ , respectively.

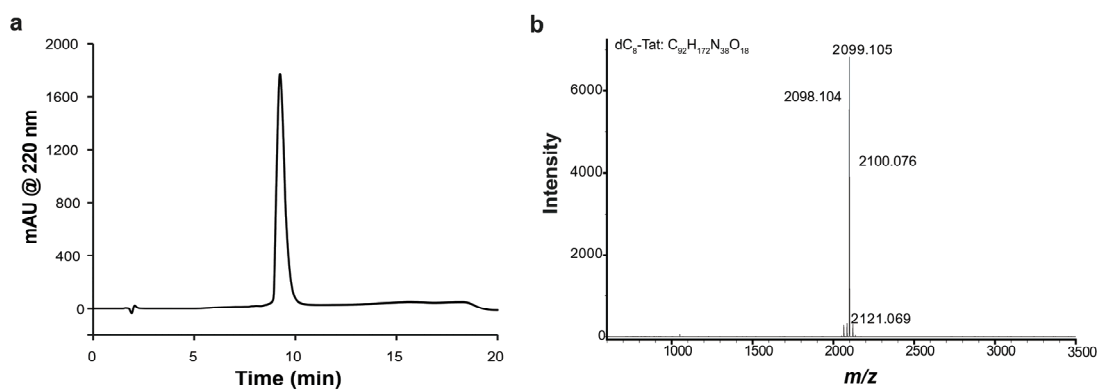

**Figure S2.** RP-HPLC (a) and MALDI-TOF MS (b) characterization of dC<sub>8</sub>-Tat. The RP-HPLC spectrum confirms the purity of the product (>99%). The peaks at 2099.105 and 2121.069 correspond to [M+H]<sup>+</sup> and [M+Na]<sup>+</sup>, and other peaks are the isotopic peak of [M+H]<sup>+</sup>.

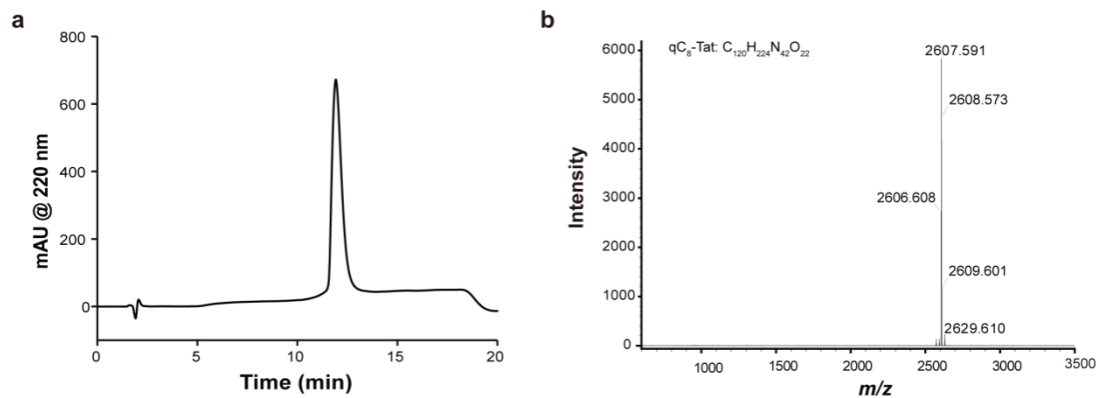

**Figure S3.** RP-HPLC (a) and MALDI-TOF MS (b) characterization of qC<sub>8</sub>-Tat. The RP-HPLC spectrum confirms the purity of the product (>99%). The peaks at 2607.591 and 2629.610 correspond to [M+H]<sup>+</sup> and [M+Na]<sup>+</sup>, and other peaks are the isotopic peak of [M+H]<sup>+</sup>.

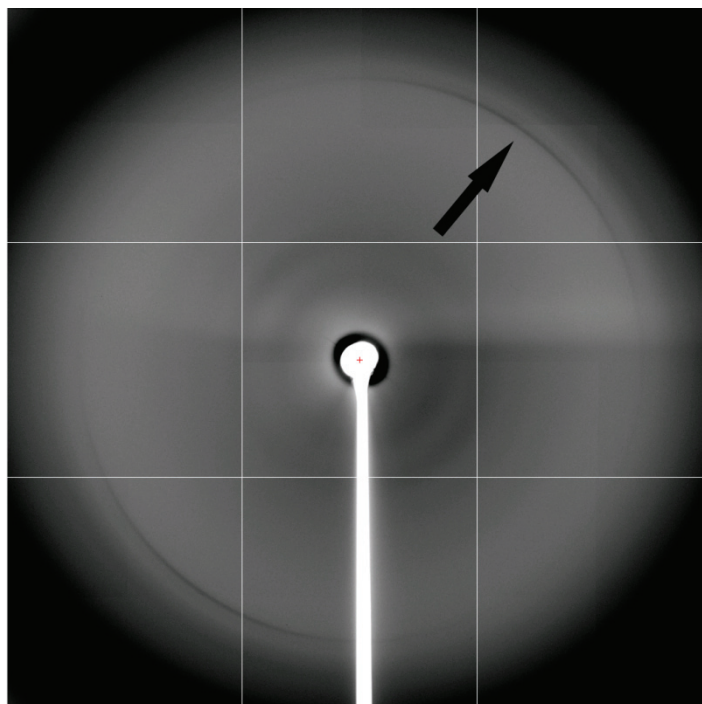

**Figure S4.** Wide angle X-ray scattering 2-D pattern collected from an aqueous solution of Tat nanofibers. The reflection (marked with black arrow) corresponds to a  $d$ -spacing of  $4.7 \text{ \AA}$ , a signature for  $\beta$ -sheet assemblies. The observation of two arcs instead of a Debye-Scherrer ring is due to the alignment of Tat nanofiber by pipetting during the sample preparation.

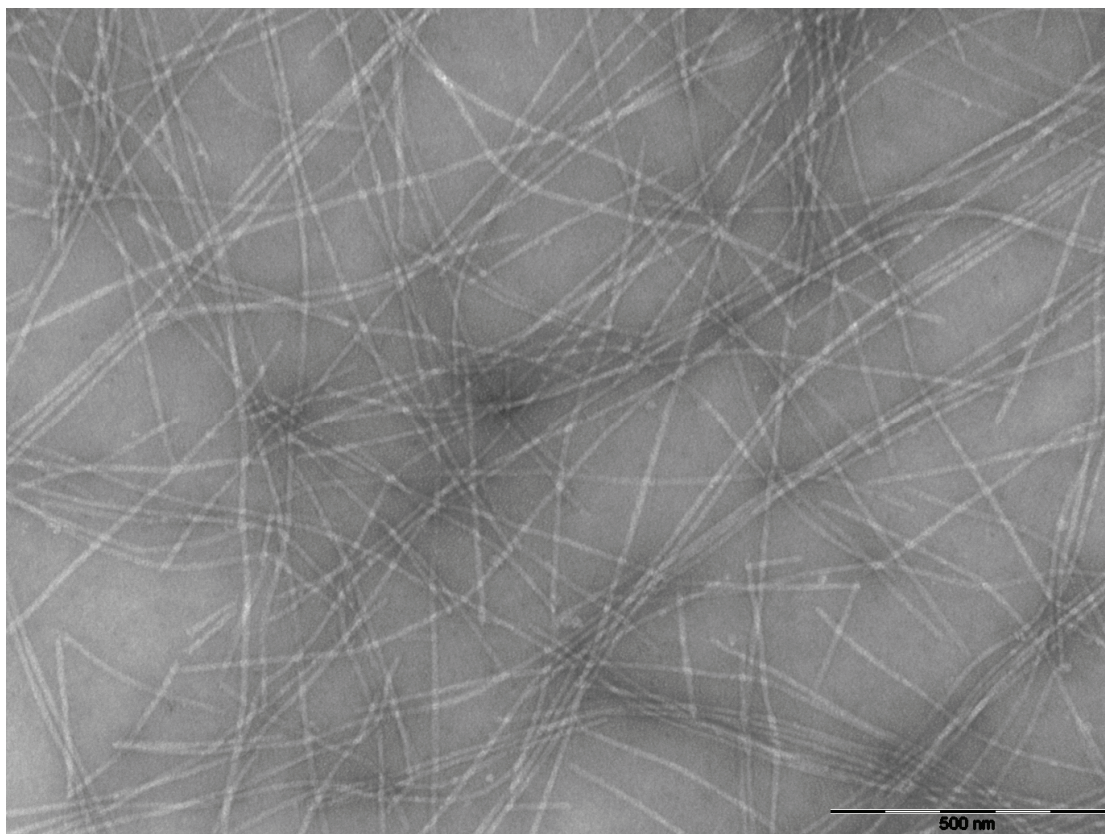

**Figure S5.** TEM image of nanofibers formed by qC<sub>8</sub>-Tat in DPBS at 2 mM. Uranyl acetate (2 wt%) was used as a negative staining agent

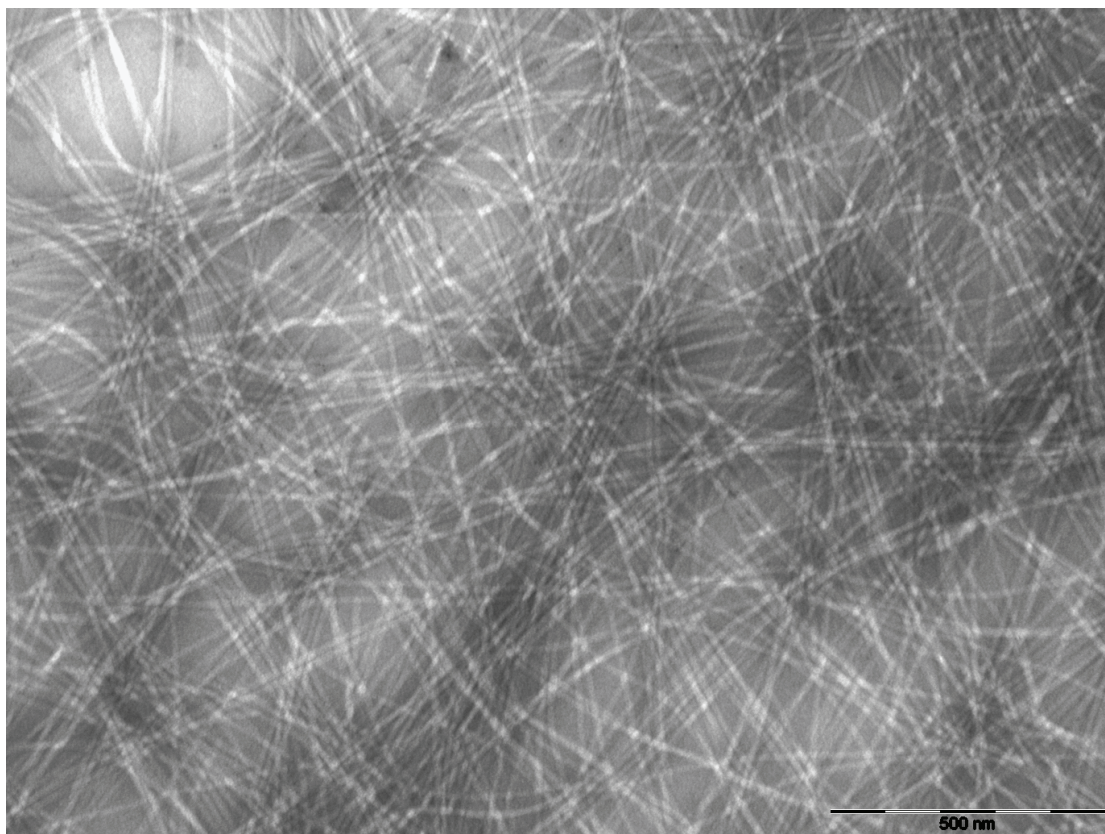

**Figure S6.** TEM image of nanofibers formed by mixing qC<sub>8</sub>-Tat (2 mM) with PTX at a molar ratio of 100:1 in DPBS. Uranyl acetate (2 wt%) was used as a negative staining agent

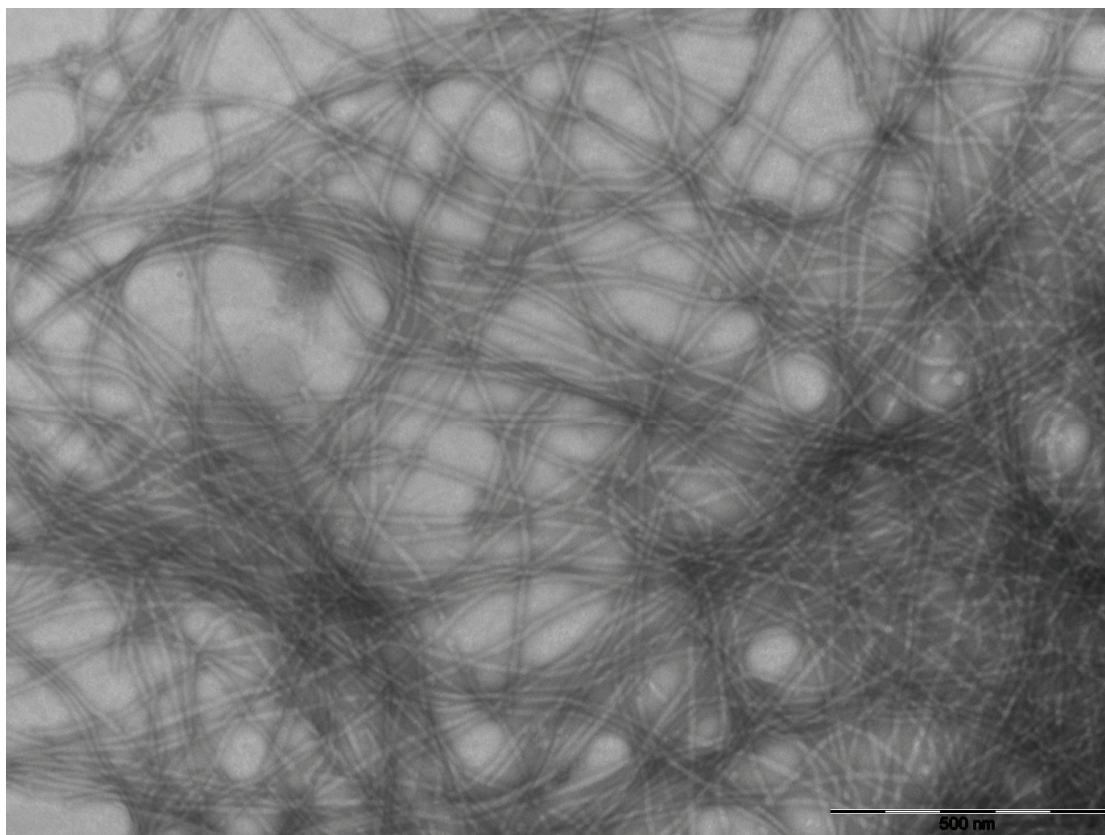

**Figure S7.** TEM image of nanofibers formed by mixing qC<sub>8</sub>-Tat (2 mM) with PTX at a molar ratio of 20:1 in DPBS. Uranyl acetate (2wt%) was used as a negative staining agent.



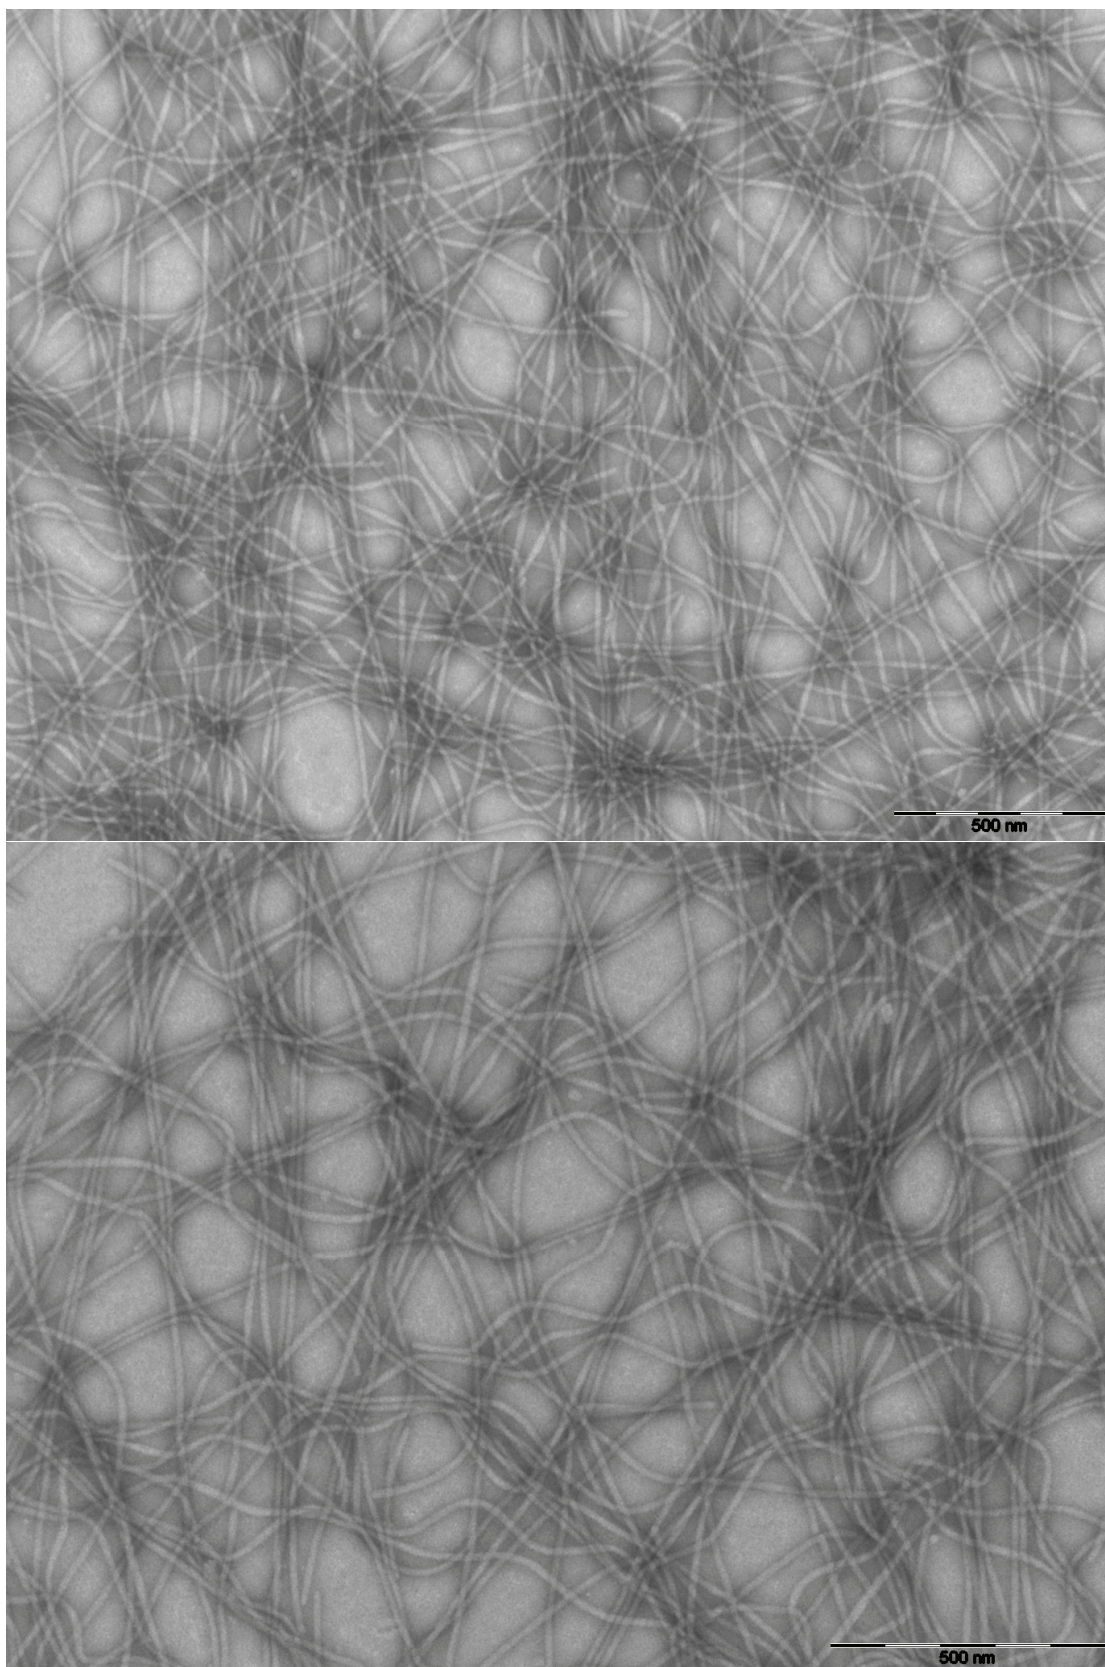

**Figure S8.** TEM image of nanofibers formed by mixing of qC<sub>8</sub>-Tat (2 mM) with PTX at a molar ratio of 10:1 in DPBS. Uranyl acetate (2 wt%) was used as a negative staining agent.

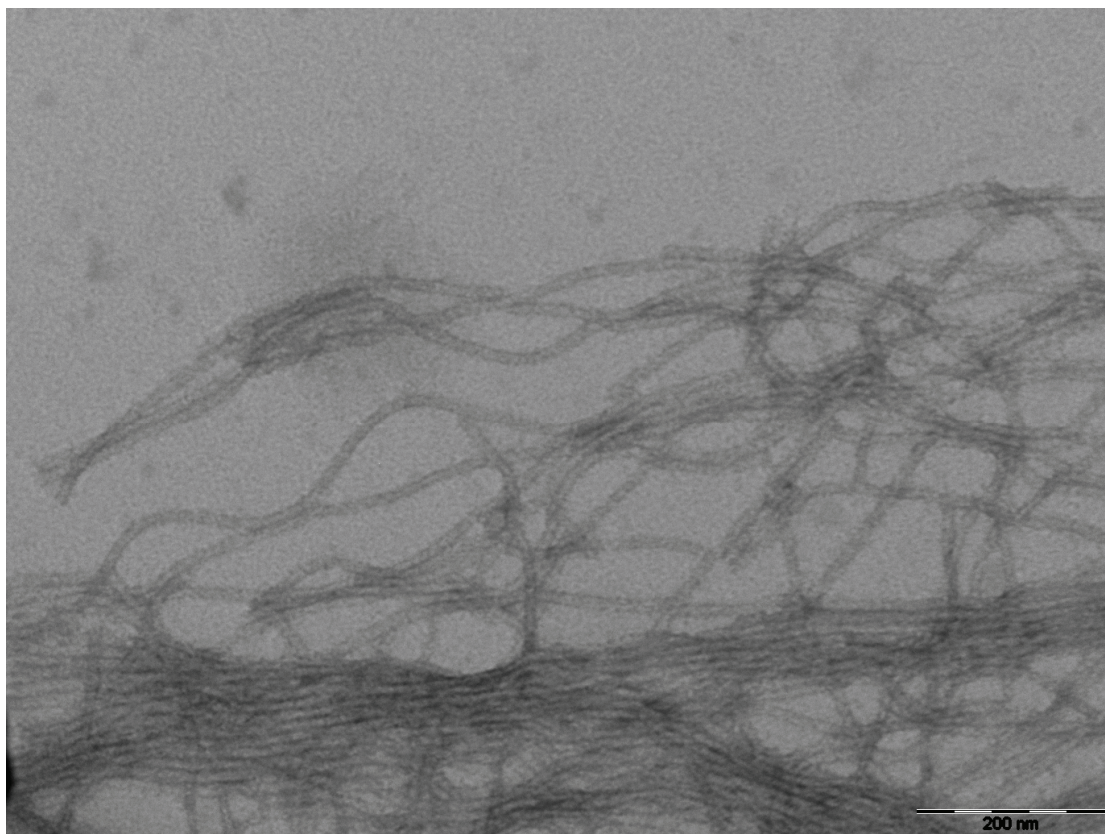

**Figure S9.** TEM image of nanofibers formed by mixing qC<sub>8</sub>-Tat (2 mM) with PTX at a molar ratio of 20:3 in DPBS. Uranyl acetate (2 wt%) was used as a negative staining agent.

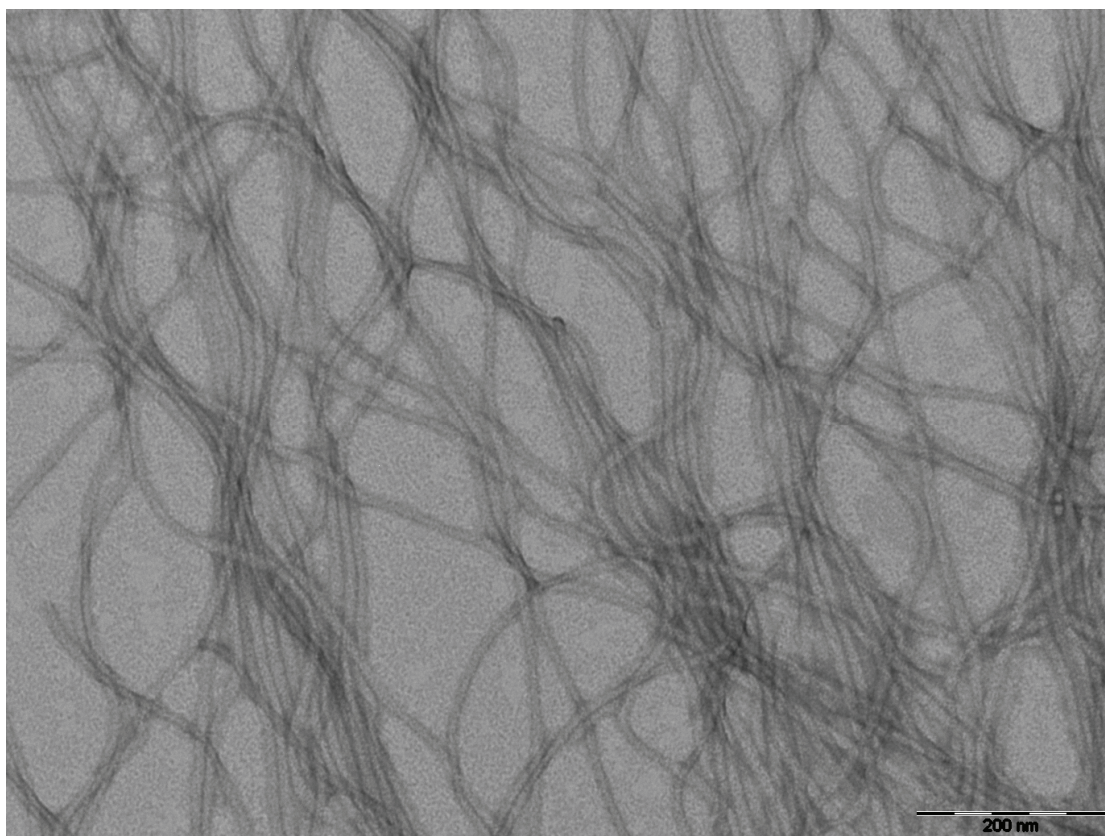

**Figure S10.** TEM image of nanofibers formed by mixing qC<sub>8</sub>-Tat (2 mM) with PTX at a molar ratio of 5:1 in DPBS. Uranyl acetate (2 wt%) was used as a negative staining agent.

**Table S1.** The diameters of PTX-N with different drug loading. Data were presented as mean  $\pm$  s.d. (n = 30).

| Conjugate to PTX ratio, (mol/mol) | No drug        | 100:1          | 20:1           | 10:1           | 20:3           | 5:1            |
|-----------------------------------|----------------|----------------|----------------|----------------|----------------|----------------|
| Diameter (nm)                     | 15.0 $\pm$ 0.9 | 14.9 $\pm$ 0.9 | 14.9 $\pm$ 0.8 | 15.0 $\pm$ 0.7 | 15.0 $\pm$ 0.8 | 14.8 $\pm$ 0.7 |

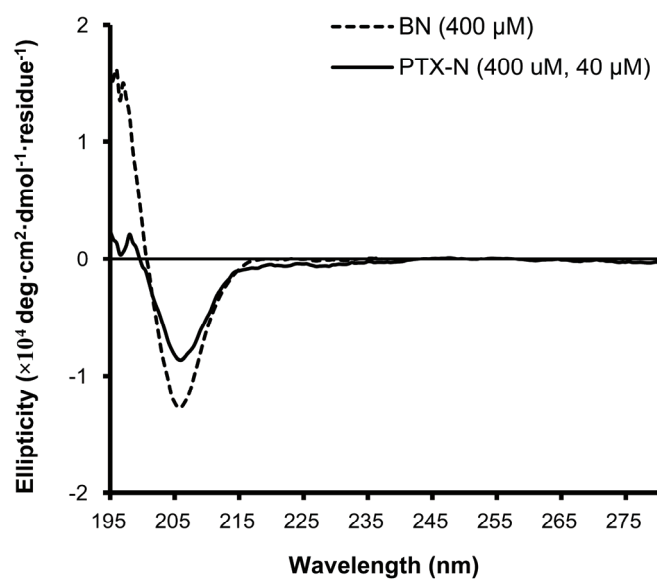

**Figure S11.** Normalized CD spectra of 400  $\mu\text{M}$  blank Tat nanofibers (BN) and Tat nanofibers loaded with PTX (PTX-N, 10:1, mol/mol) in DPBS. Both the blank nanofiber and PTX-N showed signal at around 205 nm indicating a polyproline type II (PPII) like conformation. This experiment suggests that Tat peptides are not accountable for the observed change in nanofiber morphology

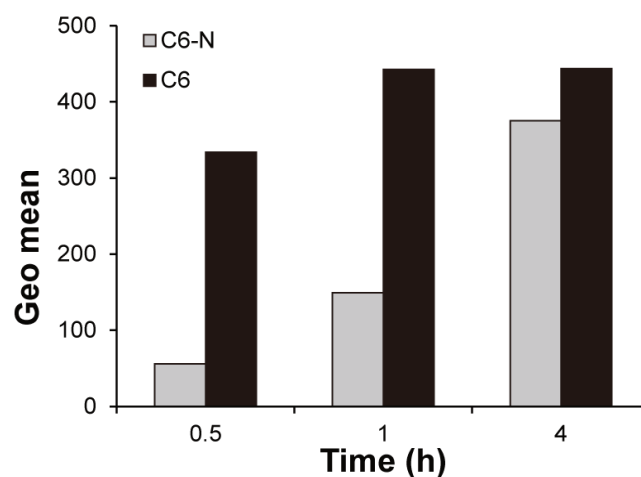

**Figure S12.** Time-course intracellular accumulation of coumarin-6 in KB-3-1 cells after incubation with either 300 nM free coumarin-6 (C6) or coumarin-6 loaded nanofibers (C6-N) for 0.5, 1 and 4 h, as determined by flow cytometry. While the intracellular accumulation kinetics between C6 and C6-N is different, comparable accumulation was achieved after 4 h incubation.

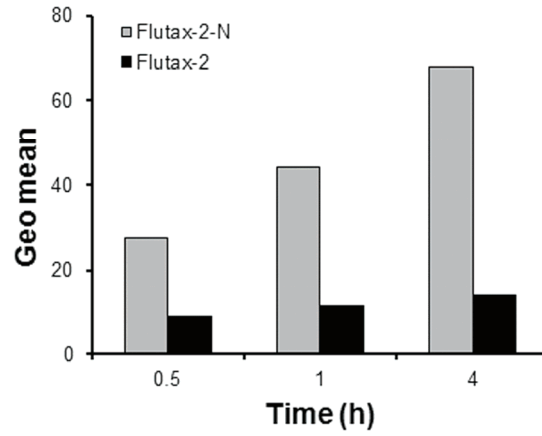

**Figure S13.** Time-course intracellular accumulation of Flutax-2 in KB-3-1 cells after incubation with either 500 nM free Flutax-2 or Flutax-2 loaded nanofibers (Flutax-2-N) for 0.5, 1 and 4 h, as determined by flow cytometry. The intracellular accumulation of Flutax-2-N is more efficient than free Flutax-2.

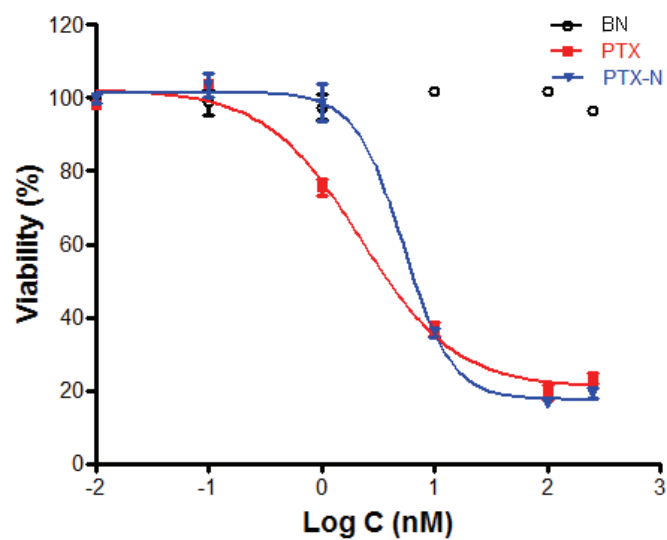

**Figure S14.** Cell viability of A549 non-small cell lung cancer cells treated for 48 h with PTX (0.01 – 250 nM), PTX-N (0.01 – 250 nM PTX and 0.1 – 2500 nM qC<sub>8</sub>-Tat), or qC<sub>8</sub>-Tat (0.1 – 2500 nM qC<sub>8</sub>-Tat). Comparable cytotoxicity was observed for free PTX and PTX-N, indicating encapsulation did not reduce the antitumor activity of paclitaxel to A549. qC<sub>8</sub>-Tat did not contribute to the cytotoxicity significantly at the concentrations used for paclitaxel encapsulation.



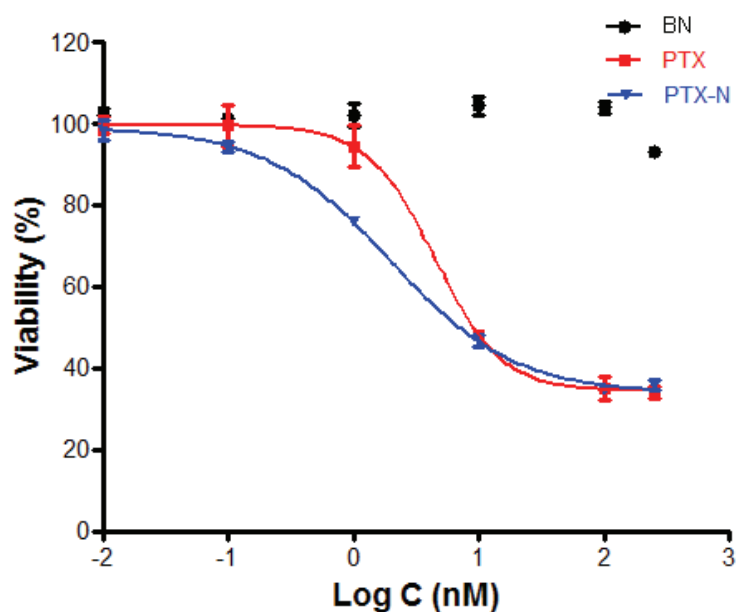

**Figure S15.** Cell viability of MDA-MB-231 breast cancer cells treated for 48 h with PTX (0.01 – 250 nM), PTX-N (0.01 – 250 nM PTX and 0.1 – 2500 nM qC<sub>8</sub>-Tat), or qC<sub>8</sub>-Tat (0.1 – 2500 nM qC<sub>8</sub>-Tat). Comparable cytotoxicity was observed for free PTX and PTX-N, indicating encapsulation did not reduce the antitumor activity of paclitaxel to MDA-MB-231. qC<sub>8</sub>-Tat did not contribute to the cytotoxicity significantly at the concentrations used for paclitaxel encapsulation.

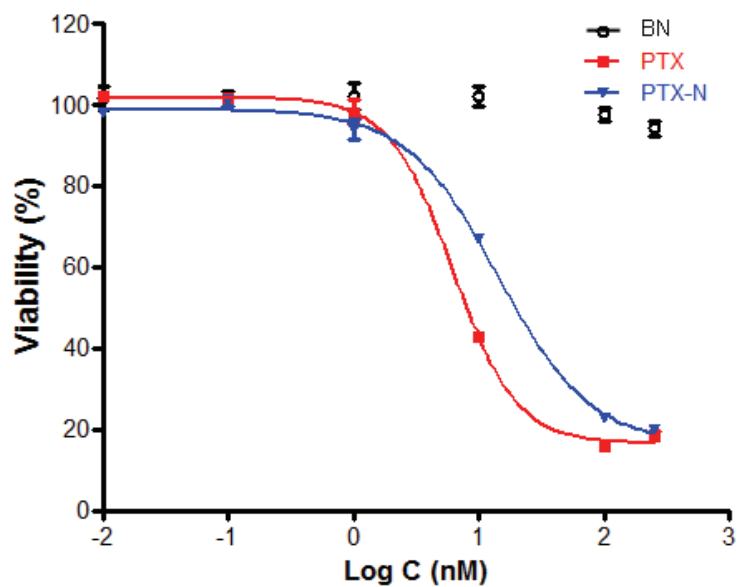

**Figure S16.** Cell viability of OVCAR-8 ovarian cancer cells treated for 48 h with PTX (0.01 – 250 nM), PTX-N (0.01 – 250 nM PTX and 0.1 – 2500 nM qC<sub>8</sub>-Tat), or qC<sub>8</sub>-Tat (0.1 – 2500 nM qC<sub>8</sub>-Tat). Comparable cytotoxicity was observed for free PTX and PTX-N, indicating encapsulation did not reduce the antitumor activity of paclitaxel. qC<sub>8</sub>-Tat did not contribute to the cytotoxicity significantly at the concentrations used for paclitaxel encapsulation.

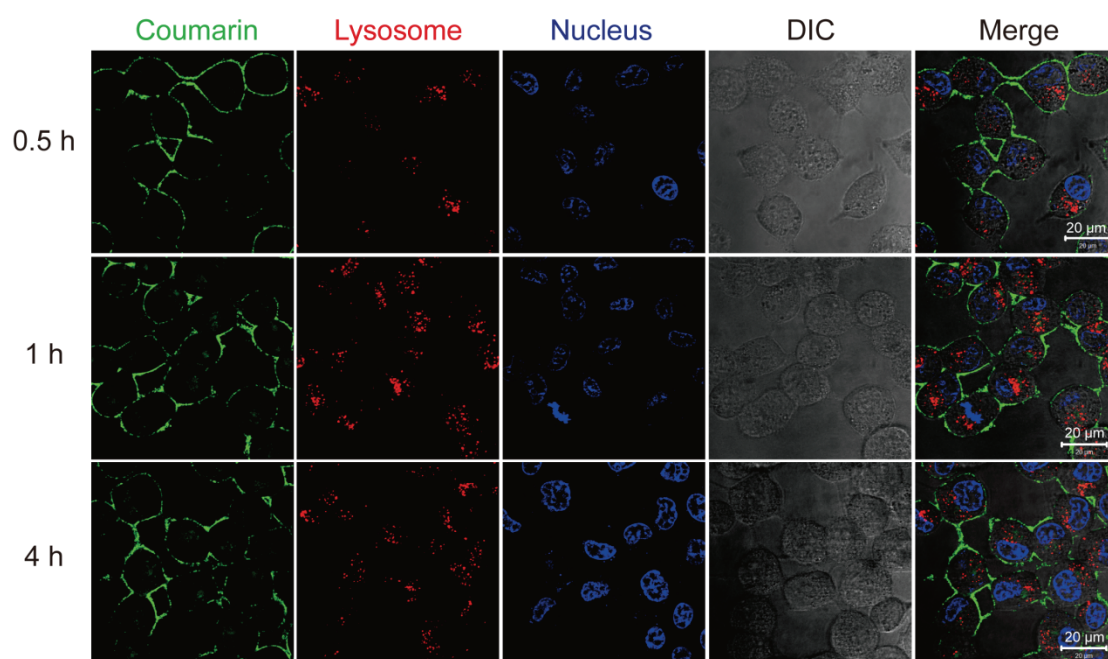

**Figure S17.** Subcellular colocalization of free coumarin-6 (green) in live KB-3-1 with lysosome (Lysotracker red, red) and nucleus (Hoechst 33342, blue) after incubation of cells with 0.3  $\mu\text{M}$  of coumarin-6 for 0.5, 1, and 4 h at 37  $^{\circ}\text{C}$ . This experiment reveals clearly coumarin-6 dominantly accumulated in the cell membrane even after 4 h incubation, in sharp contrast to coumarin-6 delivered by Tat nanofibers which accumulated largely within the cells.

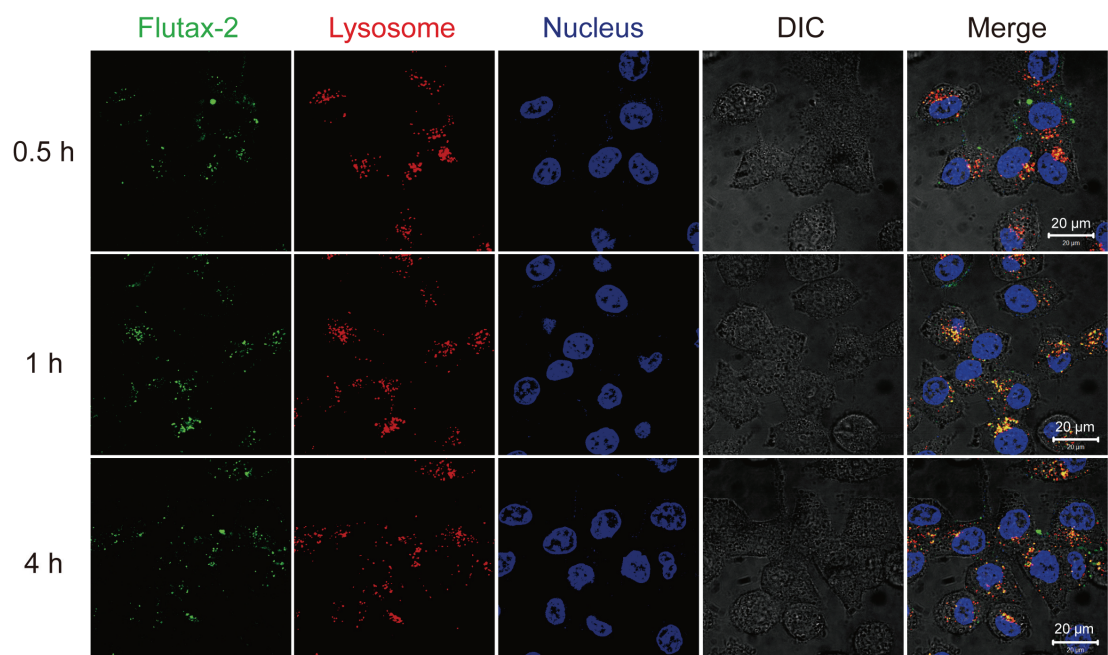

**Figure S18.** Subcellular colocalization of free Flutax-2 (green) in live KB-3-1 with lysosome (Lysotracker red, red) and nucleus (Hoechst 33342, blue) after incubation of cells with 0.5  $\mu\text{M}$  of Flutax-2 for 0.5, 1, and 4 h at 37  $^{\circ}\text{C}$ . This experiment reveals lower intracellular accumulation of free Flutax-2 compared with Flutax-2-N. The co-localization of Flutax-2 (green) with lysosome (red) indicates that free Flutax-2 did not enter the cells through free diffusion.
